# Supplementary material
Source: MDPI journal article supplement (https://www.mdpi.com/2221-3759/10/1/1)
Supplement: s1 [file s1]

## Supplemental File 2. Batch Effect Analysis

### Principal Component Analysis for Batch effect

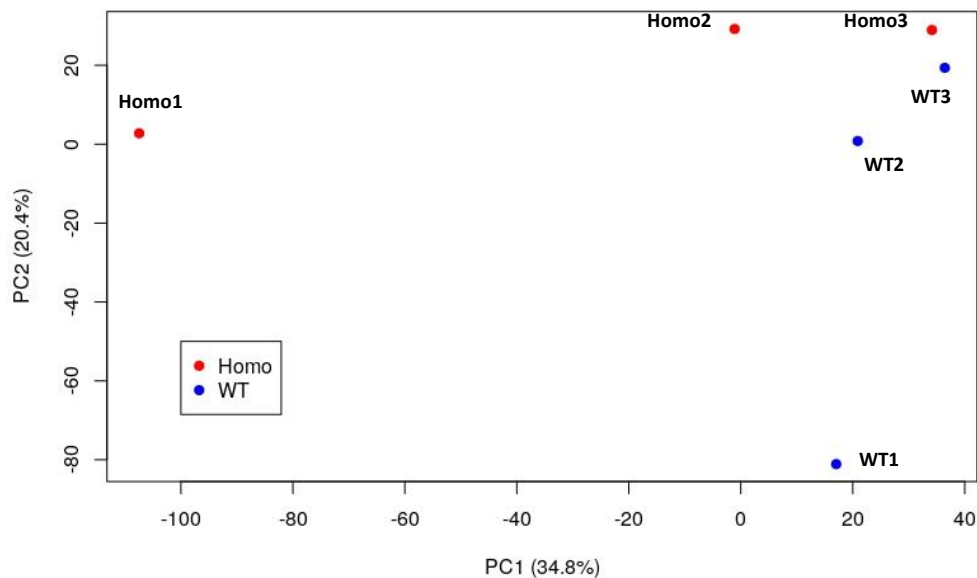

| Sample | Batch |
|--------|-------|
| WT1    | 1     |
| HOMO1  | 1     |
| WT2    | 1     |
| HOMO2  | 1     |
| WT3    | 2     |
| HOMO3  | 2     |

1. There are 2 batches of runs for interlaced 6 samples.
2. The PCA shows that there is **no** batch effect.
