# Supplementary material
Source: MDPI journal article supplement (https://www.mdpi.com/2221-3759/10/1/1)
Supplement: s1 [file s1]

Supplemental File 5. Genes hits in GO analysis

| Cell Motility &<br>Tube Development |      |         | Cell Motility &<br>Cell Projection Organization |      |         | Tube Development &<br>Cell Projection Organization |      |         |
|-------------------------------------|------|---------|-------------------------------------------------|------|---------|----------------------------------------------------|------|---------|
| Total:42                            | FC   | p_val   | Total: 56                                       | FC   | p_val   | Total: 25                                          | FC   | p_val   |
| Vegfa                               | 2.67 | 0.0295  | Vegfa                                           | 2.67 | 0.0295  | Vegfa                                              | 2.67 | 0.0295  |
| Hgf                                 | 1.71 | 0.0467  | Hgf                                             | 1.71 | 0.0467  | Hgf                                                | 1.71 | 0.0467  |
| Shh                                 | 1.34 | 0.0212  | Shh                                             | 1.34 | 0.0212  | Shh                                                | 1.34 | 0.0212  |
| Fgf8                                | 1.26 | 0.0349  | Fgf8                                            | 1.26 | 0.0349  | Fgf8                                               | 1.26 | 0.0349  |
| Nog                                 | 1.30 | 0.0473  | Nog                                             | 1.30 | 0.0473  | Nog                                                | 1.30 | 0.0473  |
| Bmp4                                | 1.24 | 0.0460  | Bmp4                                            | 1.24 | 0.0460  | Bmp4                                               | 1.24 | 0.0460  |
| Isl1                                | 4.72 | 6.9E-06 | Isl1                                            | 4.72 | 6.9E-06 | Isl1                                               | 4.72 | 6.9E-06 |
| Ntrk2                               | 1.91 | 0.0286  | Ntrk2                                           | 1.91 | 0.0286  | Ntrk2                                              | 1.91 | 0.0286  |
| Cdh13                               | 1.63 | 0.0455  | Cdh13                                           | 1.63 | 0.0455  | Cdh13                                              | 1.63 | 0.0455  |
| Cav1                                | 1.48 | 0.0141  | Cav1                                            | 1.48 | 0.0141  | Cav1                                               | 1.48 | 0.0141  |
| Efna1                               | 1.31 | 0.0350  | Efna1                                           | 1.31 | 0.0350  | Efna1                                              | 1.31 | 0.0350  |
| Adamts1                             | 1.31 | 0.0362  | Adamts1                                         | 1.31 | 0.0362  | Adamts1                                            | 1.31 | 0.0362  |
| Ptn                                 | 1.25 | 0.0095  | Ptn                                             | 1.25 | 0.0095  | Ptn                                                | 1.25 | 0.0095  |
| Mylk                                | 0.72 | 0.0273  | Mylk                                            | 0.72 | 0.0273  | Mylk                                               | 0.72 | 0.0273  |
| Fuz                                 | 0.41 | 1.9E-06 | Fuz                                             | 0.41 | 1.9E-06 | Fuz                                                | 0.41 | 1.9E-06 |
| Lef1                                | 0.83 | 0.0447  | Gfra3                                           | 1.95 | 0.0091  | Foxd1                                              | 1.68 | 0.0484  |
| Gli1                                | 0.58 | 0.0060  | Celsr3                                          | 1.75 | 0.0202  | Dact1                                              | 1.60 | 0.0335  |
| Sox8                                | 0.50 | 0.0022  | Chl1                                            | 1.55 | 0.0494  | Adm                                                | 5.65 | 0.0109  |
| Scg2                                | 5.71 | 3.5E-05 | Phox2b                                          | 4.57 | 0.0012  | Adora2a                                            | 2.31 | 0.0012  |
| Edn1                                | 2.13 | 0.0041  | Tnr                                             | 4.33 | 0.0068  | Efna3                                              | 1.81 | 0.0218  |
| Flt1                                | 2.02 | 0.0109  | Drc1                                            | 2.08 | 0.0361  | Tbx6                                               | 1.72 | 0.0488  |
| Lox                                 | 1.47 | 0.0380  | Unc5d                                           | 1.98 | 0.0137  | Hey1                                               | 1.36 | 0.0414  |
| Dll4                                | 1.46 | 0.0076  | Sema4g                                          | 1.94 | 0.0052  | Id1                                                | 1.33 | 0.0030  |
| F3                                  | 1.37 | 0.0093  | Cfap54                                          | 1.89 | 0.0080  | Dicer1                                             | 0.76 | 0.0155  |
| Vegfb                               | 1.36 | 0.0314  | Grin1                                           | 1.81 | 0.0477  | Serpine2                                           | 0.73 | 0.0316  |
| Mmp9                                | 1.35 | 0.0310  | Ccdc141                                         | 1.73 | 0.0175  |                                                    |      |         |
| Hdac9                               | 1.35 | 0.0318  | Trim46                                          | 1.65 | 0.0164  |                                                    |      |         |
| Emc10                               | 0.80 | 0.0144  | Mapk15                                          | 1.63 | 2.2E-05 |                                                    |      |         |
| Syk                                 | 0.77 | 0.0163  | Ccdc65                                          | 1.63 | 0.0293  |                                                    |      |         |
| Abcc8                               | 0.74 | 0.0497  | Icam1                                           | 1.59 | 0.0114  |                                                    |      |         |
| Cyp1b1                              | 0.68 | 0.0038  | Sema6b                                          | 1.56 | 0.0390  |                                                    |      |         |
| Itgb2                               | 0.59 | 0.0034  | Phactr1                                         | 1.55 | 0.0211  |                                                    |      |         |
| Il18                                | 0.52 | 0.0141  | Matn2                                           | 1.54 | 0.0261  |                                                    |      |         |
| Cx3cr1                              | 0.51 | 0.0002  | Mif                                             | 1.51 | 0.0168  |                                                    |      |         |
| Myocd                               | 0.48 | 4.0E-05 | Artn                                            | 1.49 | 0.0323  |                                                    |      |         |
| Ascl1                               | 0.37 | 5.2E-05 | Efemp1                                          | 1.48 | 0.0317  |                                                    |      |         |
| Ccr2                                | 0.35 | 1.4E-06 | Rsph9                                           | 1.40 | 0.0189  |                                                    |      |         |
| Nodal                               | 0.27 | 0.0110  | Rac3                                            | 1.35 | 0.0310  |                                                    |      |         |
| Apob                                | 0.19 | 1.1E-04 | Sema3f                                          | 1.22 | 0.0442  |                                                    |      |         |
| Hrg                                 | 0.09 | 0.0070  | Plaa                                            | 0.82 | 0.0250  |                                                    |      |         |
| Plg                                 | 0.05 | 0.0016  | Hsp90aa1                                        | 0.79 | 0.0423  |                                                    |      |         |
| Edn2                                | 0.05 | 0.0013  | Coro1a                                          | 0.79 | 0.0457  |                                                    |      |         |
|                                     |      |         | Plxna1                                          | 0.78 | 0.0123  |                                                    |      |         |
|                                     |      |         | Csf1r                                           | 0.68 | 0.0260  |                                                    |      |         |
|                                     |      |         | Rac2                                            | 0.67 | 0.0043  |                                                    |      |         |
|                                     |      |         | Nckap1l                                         | 0.64 | 4.6E-04 |                                                    |      |         |
|                                     |      |         | Shtn1                                           | 0.63 | 0.0387  |                                                    |      |         |
|                                     |      |         | Cntn2                                           | 0.61 | 0.0255  |                                                    |      |         |
|                                     |      |         | Clrn1                                           | 0.52 | 1.2E-06 |                                                    |      |         |
|                                     |      |         | Sema7a                                          | 0.51 | 0.0191  |                                                    |      |         |
|                                     |      |         | P2ry12                                          | 0.50 | 0.0111  |                                                    |      |         |
|                                     |      |         | Pou4f1                                          | 0.44 | 0.0301  |                                                    |      |         |
|                                     |      |         | Trem2                                           | 0.44 | 5.6E-04 |                                                    |      |         |
|                                     |      |         | Ccr7                                            | 0.44 | 0.0426  |                                                    |      |         |
|                                     |      |         | Dnaic1                                          | 0.35 | 0.0099  |                                                    |      |         |
|                                     |      |         | Myoc                                            | 0.20 | 0.0190  |                                                    |      |         |
